# Supplementary material for: MIL‐53(Al) as a Versatile Platform for Ionic‐Liquid/MOF Composites to Enhance CO2 Selectivity over CH4 and N2
Source: PubMed Central journal article supplement — Chem Asian J. 2019 Jul 24;14(20):3655–67. doi: 10.1002/asia.201900634 (PMC6851973; doi:10.1002/asia.201900634), 2019-07-24
Supplement: ASIA-14-3655-s001.pdf [file ASIA-14-3655-s001.pdf]

# CHEMISTRY

---

## AN **ASIAN** JOURNAL

### Supporting Information

#### **MIL-53(Al) as a Versatile Platform for Ionic-Liquid/MOF Composites to Enhance CO<sub>2</sub> Selectivity over CH<sub>4</sub> and N<sub>2</sub>**

Safiyye Kavak<sup>+, [a, c]</sup> H. Mert Polat<sup>+, [a, c]</sup> Harun Kulak<sup>+, [b, c]</sup> Seda Keskin,<sup>\*, [b, c]</sup> and Alper Uzun<sup>\*, [b, c, d]</sup>

asia\_201900634\_sm\_miscellaneous\_information.pdf

**Table S1.** Physical and chemical properties of the MOFs we considered in this work.

| MOF        | Metal            | Organic Ligand                                                                      | Surface Area<br>(m <sup>2</sup> /g) | Pore Volume<br>(cm <sup>3</sup> /g) | Hydro<br>(philicity/phobicity) | Exposed<br>Adsorption Sites                           |
|------------|------------------|-------------------------------------------------------------------------------------|-------------------------------------|-------------------------------------|--------------------------------|-------------------------------------------------------|
| MIL-53(Al) | Al <sup>3+</sup> | 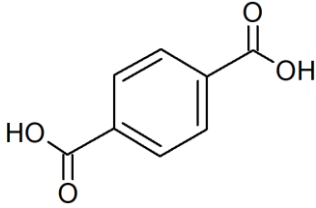   | 472                                 | 0.161                               | Hydrophilic                    | Exposed hydroxyl<br>bridges<br>(μ <sub>2</sub> (O-H)) |
| CuBTC      | Cu <sup>2+</sup> |    | 1324 <sup>[1]</sup>                 | 0.522 <sup>[1]</sup>                | Hydrophilic                    | Open metal site                                       |
| ZIF-8      | Zn <sup>2+</sup> |  | 1208 <sup>[2]</sup>                 | 0.633 <sup>[2]</sup>                | Hydrophobic                    | None                                                  |

**Table S2.** Physical and chemical properties of the ILs we considered in this work.

| IL                                       | Anion Structure                                                                     | Molecular Formula                                                                           | Molecular Weight (g/mol) | Hydro (philicity/phobicity) |
|------------------------------------------|-------------------------------------------------------------------------------------|---------------------------------------------------------------------------------------------|--------------------------|-----------------------------|
| [BMIM][BF <sub>4</sub> ]                 | 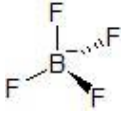   | C <sub>8</sub> H <sub>15</sub> BF <sub>4</sub> N <sub>2</sub>                               | 226.02                   | Hydrophilic                 |
| [BMIM][PF <sub>6</sub> ]                 |    | C <sub>8</sub> H <sub>15</sub> F <sub>6</sub> N <sub>2</sub> P                              | 284.18                   | Hydrophobic                 |
| [BMIM][CF <sub>3</sub> SO <sub>3</sub> ] |    | C <sub>9</sub> H <sub>15</sub> F <sub>3</sub> N <sub>2</sub> O <sub>3</sub> S               | 288.29                   | Hydrophilic                 |
| [BMIM][SbF <sub>6</sub> ]                |    | C <sub>8</sub> F <sub>6</sub> H <sub>15</sub> N <sub>2</sub> Sb                             | 374.97                   | Hydrophobic                 |
| [BMIM][MeSO <sub>4</sub> ]               |   | C <sub>9</sub> H <sub>8</sub> N <sub>2</sub> O <sub>4</sub> S                               | 250.32                   | Hydrophilic                 |
| [BMIM][NTf <sub>2</sub> ]                |  | C <sub>10</sub> H <sub>15</sub> F <sub>6</sub> N <sub>3</sub> O <sub>4</sub> S <sub>2</sub> | 419.36                   | Hydrophobic                 |

**Table S3.** Densities, calculated loading of ILs (wt.% and vol.%), the corresponding pore filling degrees, and the number of IL molecules per unit cell of MIL-53(Al) in the composites

|                                                             | <b>Density of<br/>IL<br/>(g/cm<sup>3</sup>)</b> | <b>IL<br/>loading<br/>(wt.%)</b> | <b>IL<br/>loading<br/>(vol.%)</b> | <b>Pore<br/>filling<br/>Degree<br/>(%)</b> | <b># of IL<br/>molecules/unit<br/>cell of MIL-<br/>53(Al)</b> |
|-------------------------------------------------------------|-------------------------------------------------|----------------------------------|-----------------------------------|--------------------------------------------|---------------------------------------------------------------|
| <b>[BMIM][BF<sub>4</sub>]/<br/>MIL-53(Al)</b>               | 1.21                                            | 25.8                             | 21.4                              | 77                                         | 1.22                                                          |
| <b>[BMIM][PF<sub>6</sub>]/<br/>MIL-53(Al)</b>               | 1.38                                            | 25.4                             | 19                                | 69                                         | 0.97                                                          |
| <b>[BMIM][CF<sub>3</sub>SO<sub>3</sub>]/<br/>MIL-53(Al)</b> | 1.29                                            | 25.8                             | 20.3                              | 63                                         | 0.98                                                          |
| <b>[BMIM][SbF<sub>6</sub>]/<br/>MIL-53(Al)</b>              | NA                                              | 26                               | –                                 | 65                                         | 0.76                                                          |
| <b>[BMIM][NTf<sub>2</sub>]/<br/>MIL-53(Al)</b>              | 1.43                                            | 24.1                             | 17.5                              | 59                                         | 0.62                                                          |

prepared.

Number of ion pairs per unit cell in composites are calculated using IL-loading calculated from XRF and ICP-MS, molecular weight of ILs, crystal density of MIL-53(Al) (0.955 g/cm<sup>3</sup>) and unit cell volume ( $6.6085 \times 16.675 \times 12.813 \text{ \AA}^3$ ) from corresponding The Cambridge Structural Database (CSD)<sup>[3]</sup> entry (Refcode: SABVUN<sup>[4]</sup>).

## Brunauer–Emmett–Teller (BET) Surface Area

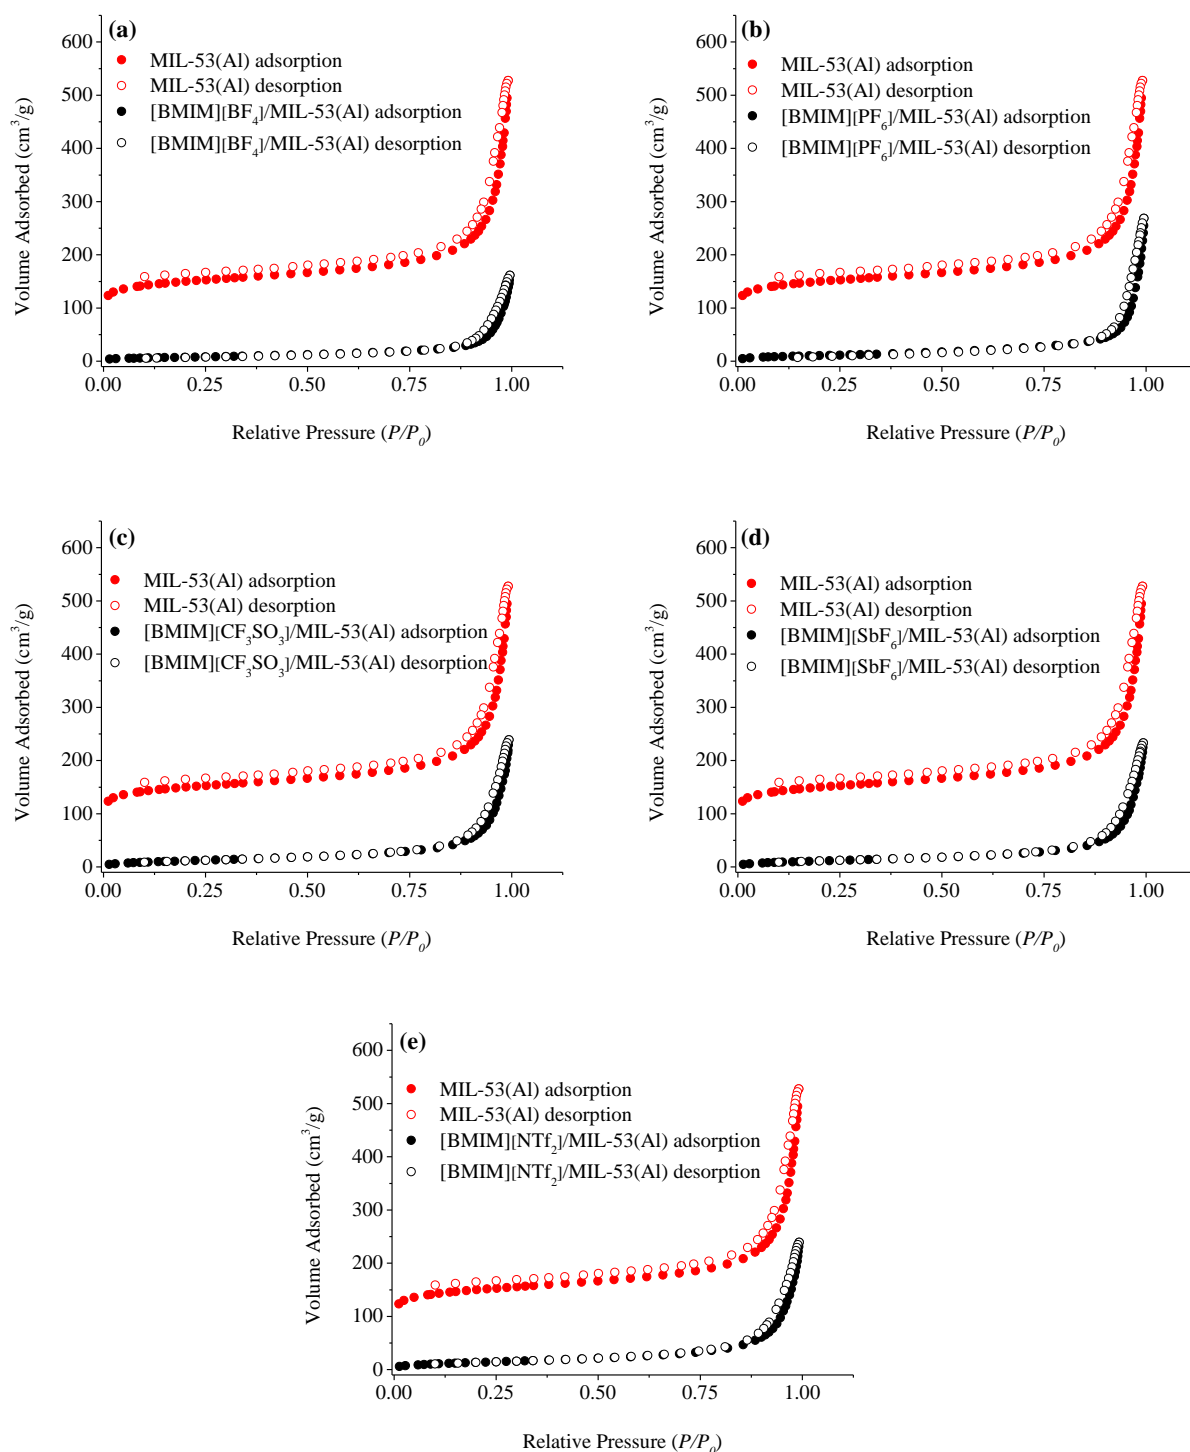

**Figure S1.** N<sub>2</sub> adsorption-desorption isotherms of pristine MIL-53(Al), and (a) [BMIM][BF<sub>4</sub>]/MIL-53(Al), (b) [BMIM][PF<sub>6</sub>]/MIL-53(Al), (c) [BMIM][CF<sub>3</sub>SO<sub>3</sub>]/MIL-53(Al), (d) [BMIM][SbF<sub>6</sub>]/MIL-53(Al), and (e) [BMIM][NTf<sub>2</sub>]/MIL-53(Al).

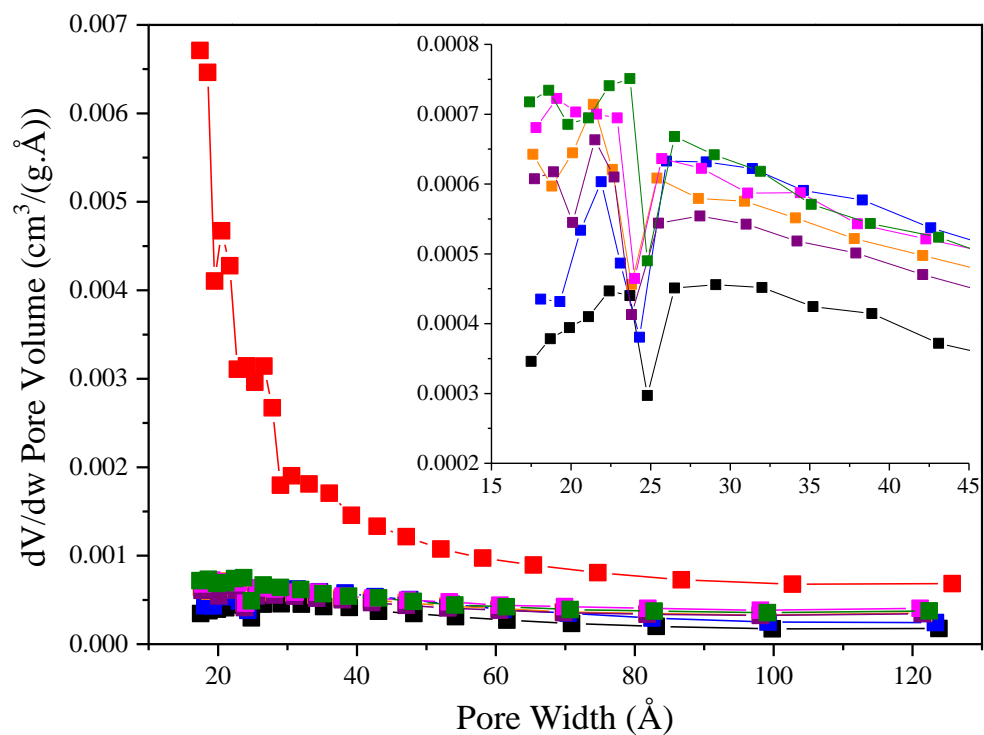

**Figure S2.** Pore size distribution (PSD) for MIL-53(Al) and all IL/MIL-53(Al) samples. Color code: red, MIL-53(Al); black, [BMIM][BF<sub>4</sub>]/MIL-53(Al); blue, [BMIM][PF<sub>6</sub>]/MIL-53(Al); orange, [BMIM][CF<sub>3</sub>SO<sub>3</sub>]/MIL-53(Al); violet, [BMIM][SbF<sub>6</sub>]/MIL-53(Al); olive, [BMIM][MeSO<sub>4</sub>]/MIL-53(Al); pink, [BMIM][NTf<sub>2</sub>]/MIL-53(Al). The inset graph shows a zoomed-in view of the IL/MIL-53(Al) samples for a clearer representation of the PSD between 15-45 Å.



*Scanning Electron Microscopy (SEM)*

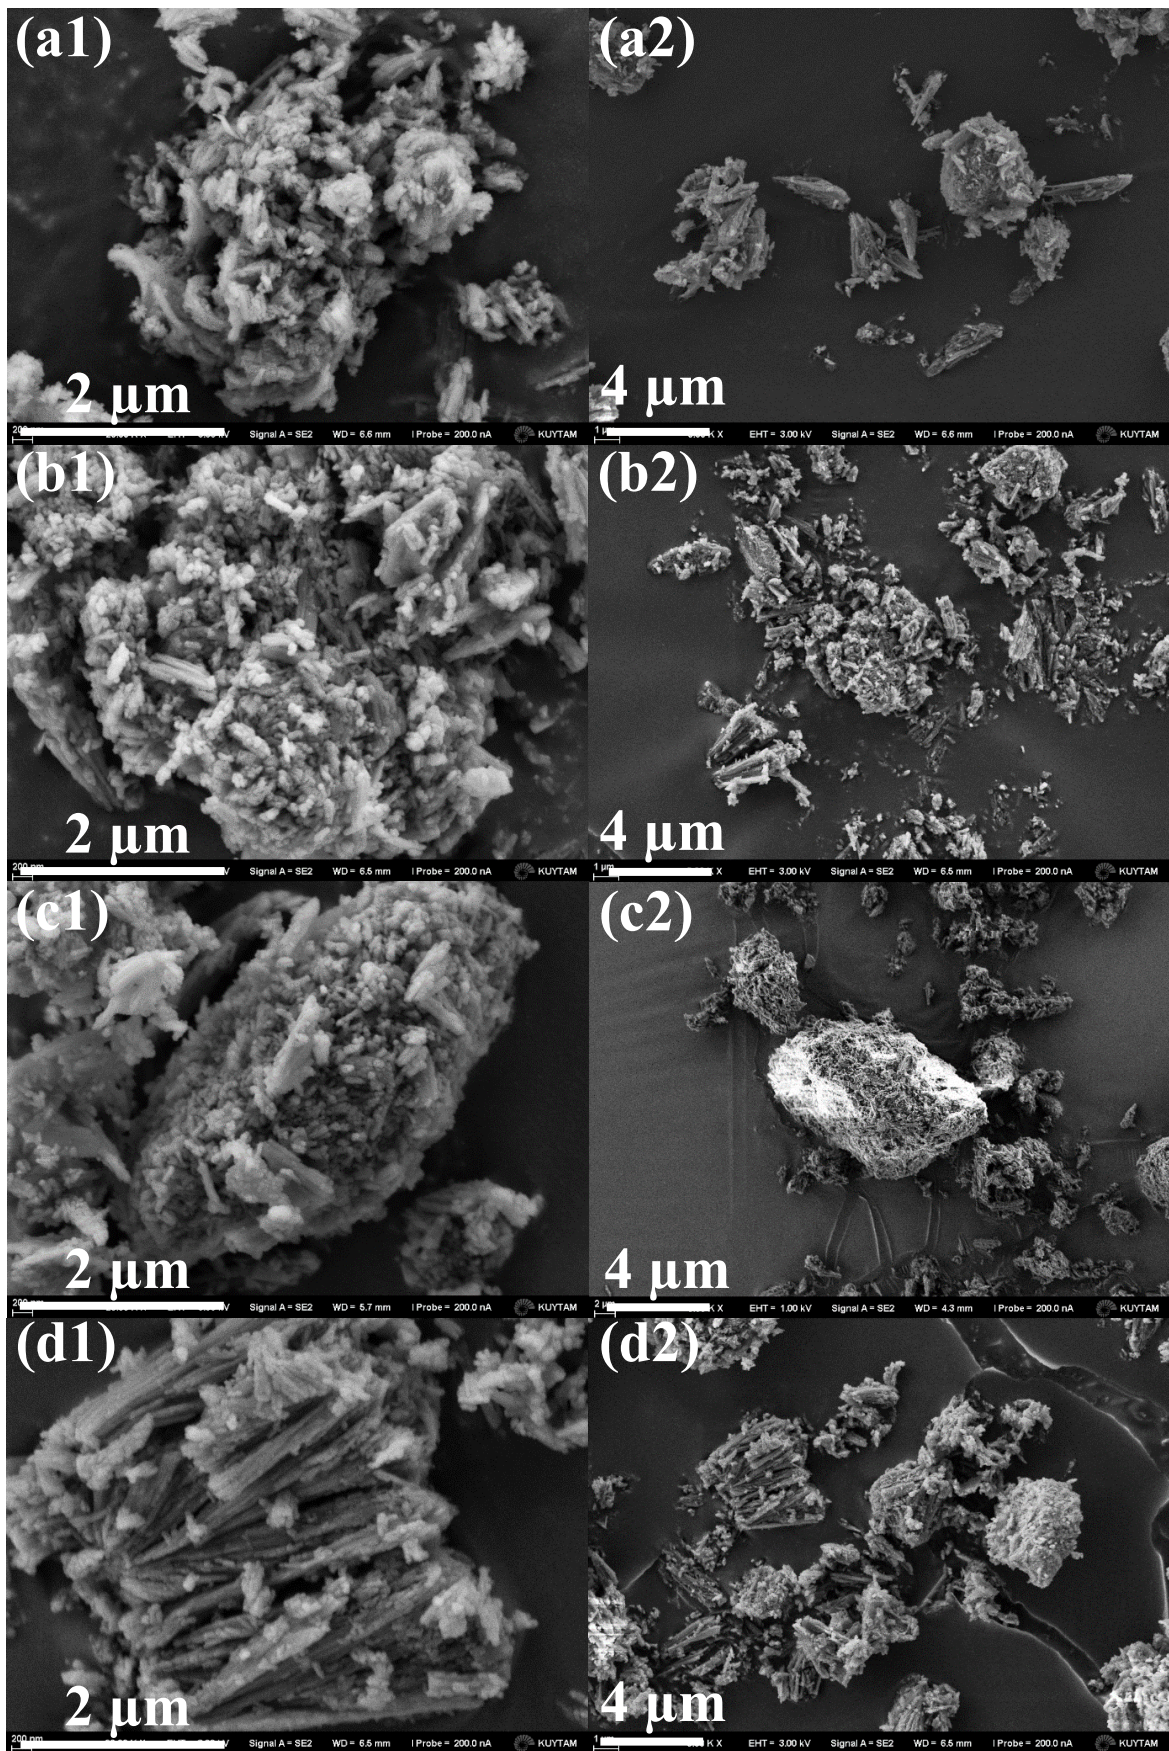



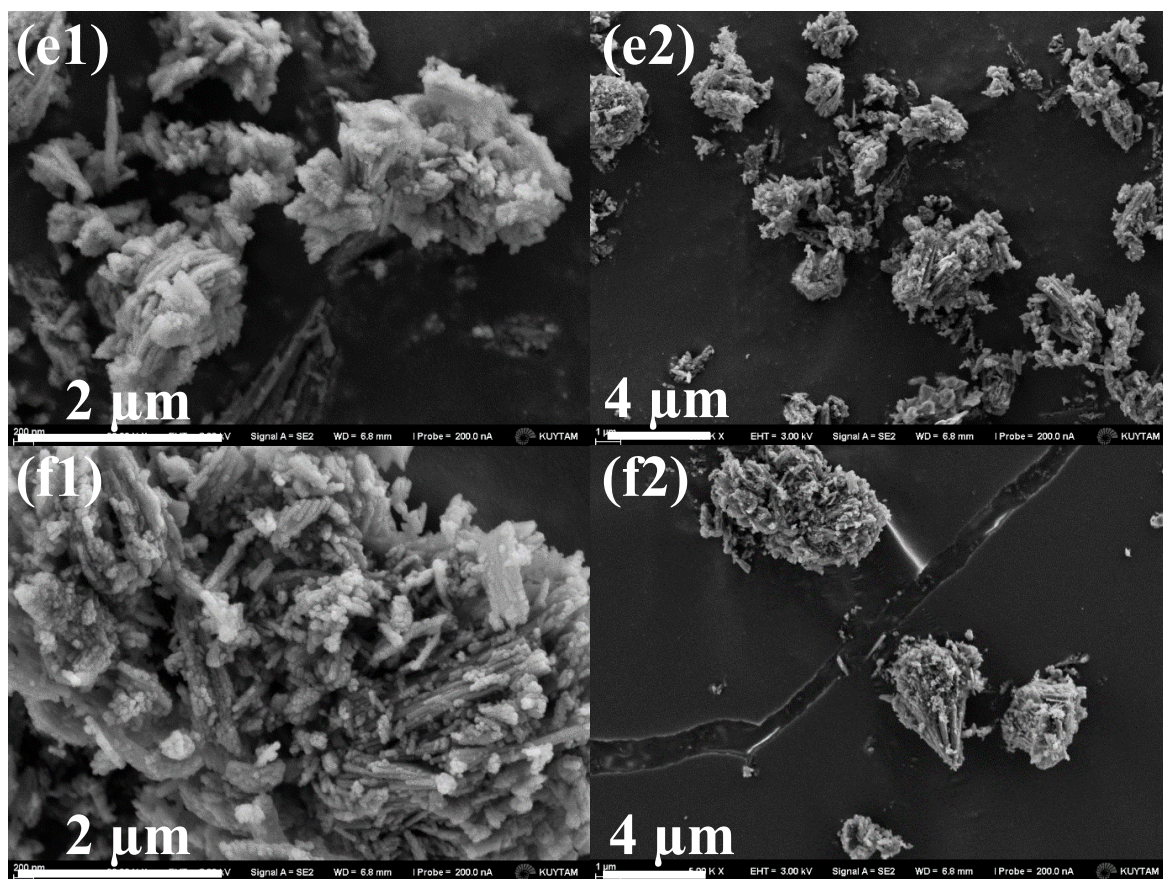

**Figure S3.** Additional SEM images of (a) pristine MIL-53(Al), (b) [BMIM][BF<sub>4</sub>]/MIL-53(Al), (c) [BMIM][PF<sub>6</sub>]/MIL-53(Al), (d) [BMIM][CF<sub>3</sub>SO<sub>3</sub>]/MIL-53(Al), (e) [BMIM][SbF<sub>6</sub>]/MIL-53(Al), (f) [BMIM][NTf<sub>2</sub>]/MIL-53(Al) at 50 and 12.5 K $\times$  magnifications.



### *X-Ray Diffraction (XRD) Spectroscopy*

**Table S4.** XRD peak positions of pristine MIL-53(Al) and IL/MIL-53(Al) composites.

| <b>Sample</b>                                          | <b>Related XRD peaks (°)</b> |     |           |      |      |      |  |
|--------------------------------------------------------|------------------------------|-----|-----------|------|------|------|--|
| <b>MIL-53(Al)</b>                                      | 8.8                          | 9.4 | 12.3      | 15.2 | 17.7 | 26.6 |  |
| <b>[BMIM][BF<sub>4</sub>]/MIL-53(Al)</b>               | 8                            | 8.5 | 11.4      | 14.9 | 17.0 | 26.7 |  |
| <b>[BMIM][PF<sub>6</sub>]/MIL-53(Al)</b>               | 8.7                          | 9.9 | 10.5      | 15.2 | 17.7 | 26.6 |  |
| <b>[BMIM][CF<sub>3</sub>SO<sub>3</sub>]/MIL-53(Al)</b> | 8.9                          | 9.1 | 10.3      | 15.3 | 17.7 | 26.6 |  |
| <b>[BMIM][SbF<sub>6</sub>]/MIL-53(Al)</b>              | 9.7                          | 9.9 | 10.3      | 15.8 | 18.6 | 26.6 |  |
| <b>[BMIM][NTf<sub>2</sub>]/MIL-53(Al)</b>              | 8.7                          | 9   | 10.6-11.1 | 15.1 | 17.4 | 26.6 |  |

## Thermal Gravimetric Analysis (TGA)

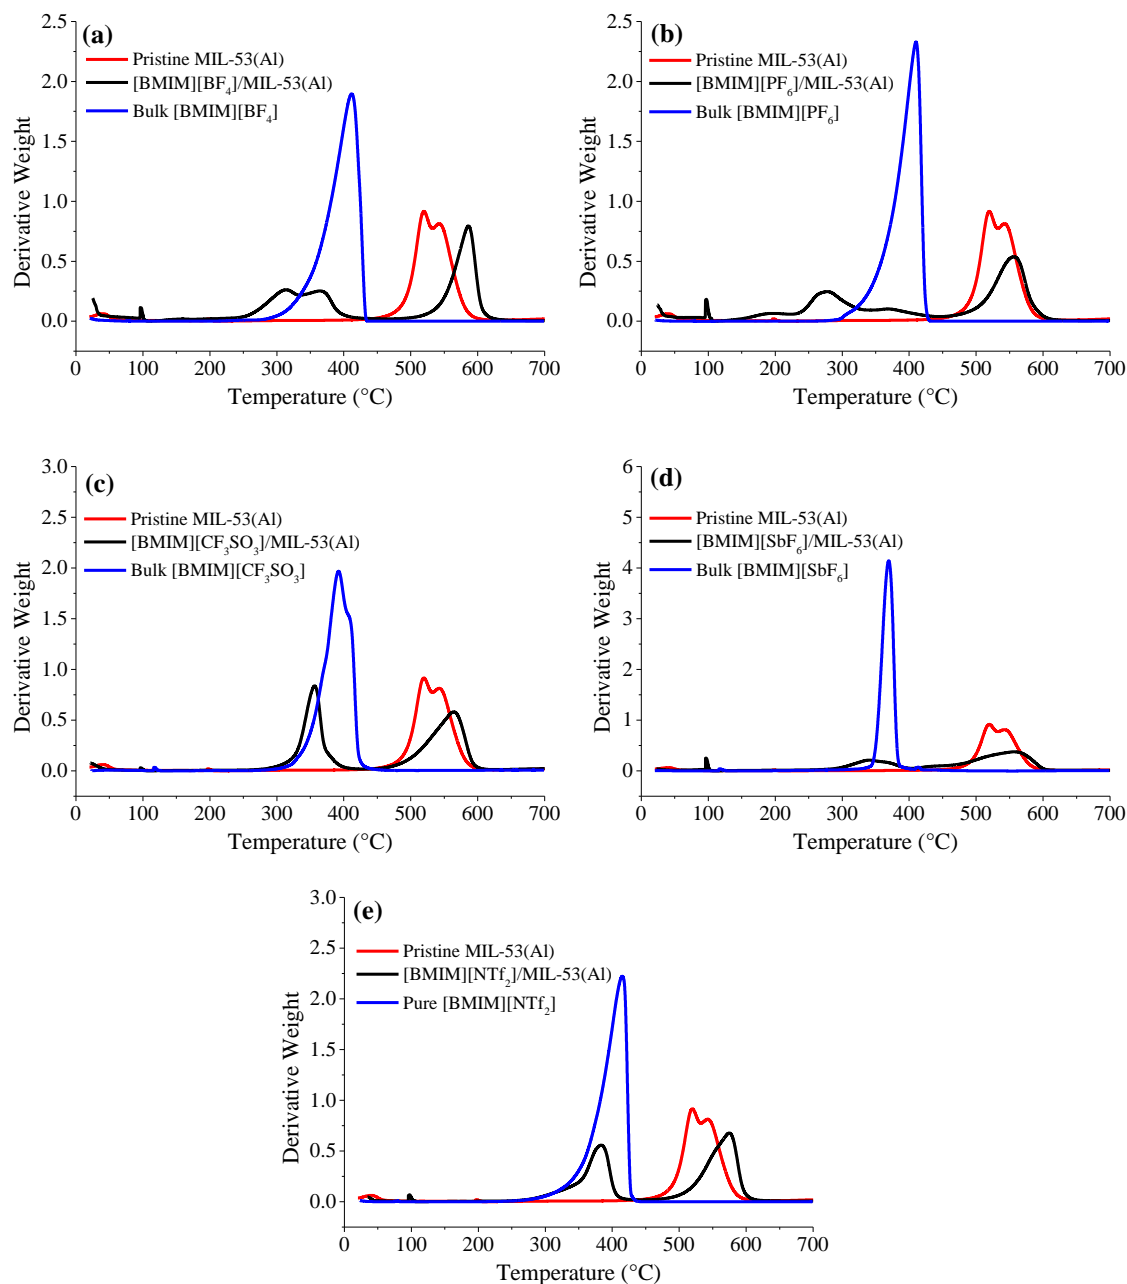

**Figure S4.** Derivative weight change of pristine MIL-53(Al), bulk ILs, and IL/MIL-53(Al) composites, where the IL is (a) [BMIM][BF<sub>4</sub>], (b) [BMIM][PF<sub>6</sub>], (c) [BMIM][CF<sub>3</sub>SO<sub>3</sub>], (d) [BMIM][SbF<sub>6</sub>], and (e) [BMIM][NTf<sub>2</sub>].

**Table S5.**  $T'_{onset}$  values of pristine MIL-53(Al), bulk ILs: [BMIM][BF<sub>4</sub>], [BMIM][PF<sub>6</sub>], [BMIM][CF<sub>3</sub>SO<sub>3</sub>], [BMIM][SbF<sub>6</sub>] and [BMIM][NTf<sub>2</sub>], and composites: [BMIM][BF<sub>4</sub>]/MIL-53(Al), [BMIM][PF<sub>6</sub>]/MIL-53(Al), [BMIM][CF<sub>3</sub>SO<sub>3</sub>]/MIL-53(Al), [BMIM][SbF<sub>6</sub>]/MIL-53(Al), and [BMIM][NTf<sub>2</sub>]/MIL-53(Al).

| MOF    | IL                                       | $T'_{onset}$ of pure IL (°C) | $T'_{onset}$ of composite (°C) | % wt. loss of bulk IL (700 °C) | % wt. loss of composite (700 °C) |
|--------|------------------------------------------|------------------------------|--------------------------------|--------------------------------|----------------------------------|
|        |                                          |                              | 484                            |                                | 61.8                             |
|        | [BMIM][BF <sub>4</sub> ]                 | 350                          | 253                            | 99.7                           | 66.1                             |
| MIL-   | [BMIM][PF <sub>6</sub> ]                 | 358                          | 233                            | 99.7                           | 64.6                             |
| 53(Al) | [BMIM][CF <sub>3</sub> SO <sub>3</sub> ] | 342                          | 326                            | 97                             | 70.9                             |
|        | [BMIM][SbF <sub>6</sub> ]                | 350                          | 285                            | 89                             | 62.1                             |
|        | [BMIM][NTf <sub>2</sub> ]                | 357                          | 342                            | 99.8                           | 68.7                             |

## *Fourier Transform Infrared (FTIR) Spectroscopy*

All IL/MIL-53(Al) composites showed the characteristic IR features of their ILs in the region of 3200-2800  $\text{cm}^{-1}$ . The data indicate red or blue shifts on the peak positions of these features from their corresponding positions in bulk materials. For instance, the symmetric stretching vibration of C(4)HC(5)H,  $\nu_{\text{ss}}(\text{C}(4)\text{HC}(5)\text{H})$ , of the imidazolium ring showed red shifts of 3 and 7  $\text{cm}^{-1}$  for [BMIM][BF<sub>4</sub>]/MIL-53(Al) and [BMIM][PF<sub>6</sub>]/MIL-53(Al), respectively.  $\nu_{\text{ss}}(\text{C}(4)\text{HC}(5)\text{H})$  of [BMIM][CF<sub>3</sub>SO<sub>3</sub>]/MIL-53(Al) showed a blue shift of 4  $\text{cm}^{-1}$ , while for [BMIM][SbF<sub>6</sub>]/MIL-53(Al) and [BMIM][NTf<sub>2</sub>]/MIL-53(Al) the shifts were in the spectral resolution. The most acidic H atom in the [BMIM]<sup>+</sup> is bonded to the C atom between two N atoms in the imidazolium ring. Therefore,  $\nu(\text{C}(2)\text{-H})$  vibration is a good indicator of the interactions between anion and cation, and IL and MOF. For [BMIM][BF<sub>4</sub>]/MIL-53(Al) and [BMIM][PF<sub>6</sub>]/MIL-53(Al),  $\nu(\text{C}(2)\text{-H})$  red-shifted by 5 and 6  $\text{cm}^{-1}$ , respectively, while it was red-shifting by 8  $\text{cm}^{-1}$  for both [BMIM][SbF<sub>6</sub>]/MIL-53(Al) and [BMIM][NTf<sub>2</sub>]/MIL-53(Al). The  $\nu(\text{C}(2)\text{-H})$  vibration red-shifted from 3115 to 3101  $\text{cm}^{-1}$  in [BMIM][CF<sub>3</sub>SO<sub>3</sub>]/MIL-53(Al) composite. A similar behavior of  $\nu(\text{C}(4)\text{HC}(5)\text{H})$  and  $\nu(\text{C}(2)\text{-H})$  vibrations of IL/MIL-53(Al) composites might be reasonable as both C(4)HC(5)H and C(2)-H are involved in H bonding between anion and cation, and both are the indicators of interionic interactions.<sup>[5]</sup> As given in Table S6, [BMIM]<sup>+</sup> originated IR spectra of IL/MIL-53(Al) composites demonstrated that IL-MOF interaction depends on the type of IL. Anion related peaks could help to understand the anion-cation and IL-MOF interactions in a clearer way. Antisymmetric stretching vibrations of [BF<sub>4</sub>]<sup>-</sup> and [PF<sub>6</sub>]<sup>-</sup>,  $\nu_{\text{as}}(\text{BF}_4)$  and  $\nu_{\text{as}}(\text{PF}_6)$ , red-shifted by 8 and 6  $\text{cm}^{-1}$  in [BMIM][BF<sub>4</sub>]/MIL-53(Al) and [BMIM][PF<sub>6</sub>]/MIL-53(Al), respectively. In the composites prepared by incorporating [BMIM][BF<sub>4</sub>] and [BMIM][PF<sub>6</sub>] into MIL-53(Al), the corresponding  $\nu(\text{C}(2)\text{-H})$  bands red-shifted, indicate the lengthening of the bond between C(2) and H. This change suggests that hydrogen bonding between anion and cation gets stronger as consistent with the literature.<sup>[6]</sup> This strengthening in the hydrogen bond between anion and cation weakens the  $\nu_{\text{as}}(\text{BF}_4)$  and  $\nu_{\text{as}}(\text{PF}_6)$  vibrations. MOF-originated IR peaks of these composites showed that  $\nu_{\text{ss}}(\text{Al-O-Al})$ ,  $\nu_{\text{as}}(\text{Al-O-Al})$ ,  $\delta(\text{O-H})$ , and  $\mu_2(\text{O-H})$  red-shifted by 6, 17, 14, and 4  $\text{cm}^{-1}$  in [BMIM][BF<sub>4</sub>]/MIL-53(Al) and 4, 19, 7, and 6  $\text{cm}^{-1}$  in [BMIM][PF<sub>6</sub>]/MIL-53(Al), respectively. On the other hand, the position of  $\nu(\text{C-C})$ , which is in the organic linker part of the MOF, did not change within the spectral resolution of the measurements. These findings demonstrate that [BMIM][BF<sub>4</sub>] and [BMIM][PF<sub>6</sub>] interact with the aluminum backbone and bridging (O-H) group of the MIL-53(Al), while they do not

interact with the organic linker side. In the case of [BMIM][CF<sub>3</sub>SO<sub>3</sub>]/MIL-53(Al),  $\nu_{ss}(\text{SO}_3)$  and  $\nu_{as}(\text{SO}_3)$ , red-shifted by 5 and 6 cm<sup>-1</sup>, and  $\nu(\text{C}(4)\text{HC}(5)\text{H})$  and  $\nu(\text{C}(2)\text{-H})$  showed blue and red shifts of 4 and 14 cm<sup>-1</sup>, respectively. (Al-O-Al) vibrations,  $\nu(\text{C-C})$  and  $\delta(\text{C-C-C})$  did not show any significant shifts, while  $\mu_2(\text{O-H})$  vibration was slightly red-shifting by 3 cm<sup>-1</sup>. These findings might indicate that with a blue shift in  $\nu(\text{C}(2)\text{-H})$ , the C(2)-H bond shortens in length and hydrogen bonding between anion and cation gets weaker. Red shifts in (SO<sub>3</sub>) vibrations can be the result of IL-MOF interactions through (SO<sub>3</sub>) side of the anion, and consequently, the (CF<sub>3</sub>) side of the anion gets stronger as indicated by a blue shift in  $\nu_{as}(\text{CF}_3)$ . [BMIM][SbF<sub>6</sub>]/MIL-53(Al) and [BMIM][NTf<sub>2</sub>]/MIL-53(Al) reveal a similar behavior: their  $\nu(\text{C}(4)\text{HC}(5)\text{H})$ ,  $\mu_2(\text{O-H})$ ,  $\nu(\text{C-C})$ ,  $\delta(\text{C-C-C})$ , and  $\nu_{ss}(\text{Al-O-Al})$  remained the same within the spectral resolution of the measurements. The position of  $\nu(\text{C}(2)\text{-H})$  red-shifted from 3122 cm<sup>-1</sup> to 3114 cm<sup>-1</sup> in both composites. For the anion side of [BMIM][SbF<sub>6</sub>]/MIL-53(Al),  $\nu(\text{SbF}_6)$  slightly blue-shifted from 658 cm<sup>-1</sup> to 661 cm<sup>-1</sup>. Similarly, in the anion side of [BMIM][NTf<sub>2</sub>]/MIL-53(Al), the peaks positions for  $\nu_{as}(\text{S-N})$  and  $\nu_{as}(\text{CF}_3)$  do not change much.  $\nu(\text{C-S})$  blue-shifted by 11 cm<sup>-1</sup>, while  $\nu_{ss}(\text{S-N})$ ,  $\nu_{ss}(\text{SO}_2)$ , and  $\nu_{as}(\text{SO}_2)$  were red-shifting by 4, 3, and 7 cm<sup>-1</sup>, respectively. These results might indicate that anions of [BMIM][SbF<sub>6</sub>] and [BMIM][NTf<sub>2</sub>] interact with MIL-53(Al) and share their electrons with the MOF. This electron sharing causes a strengthening in (Sb-F) and (C-S) bond strengths as indicated by blue shifts in  $\nu(\text{SbF}_6)$  and  $\nu(\text{C-S})$ .



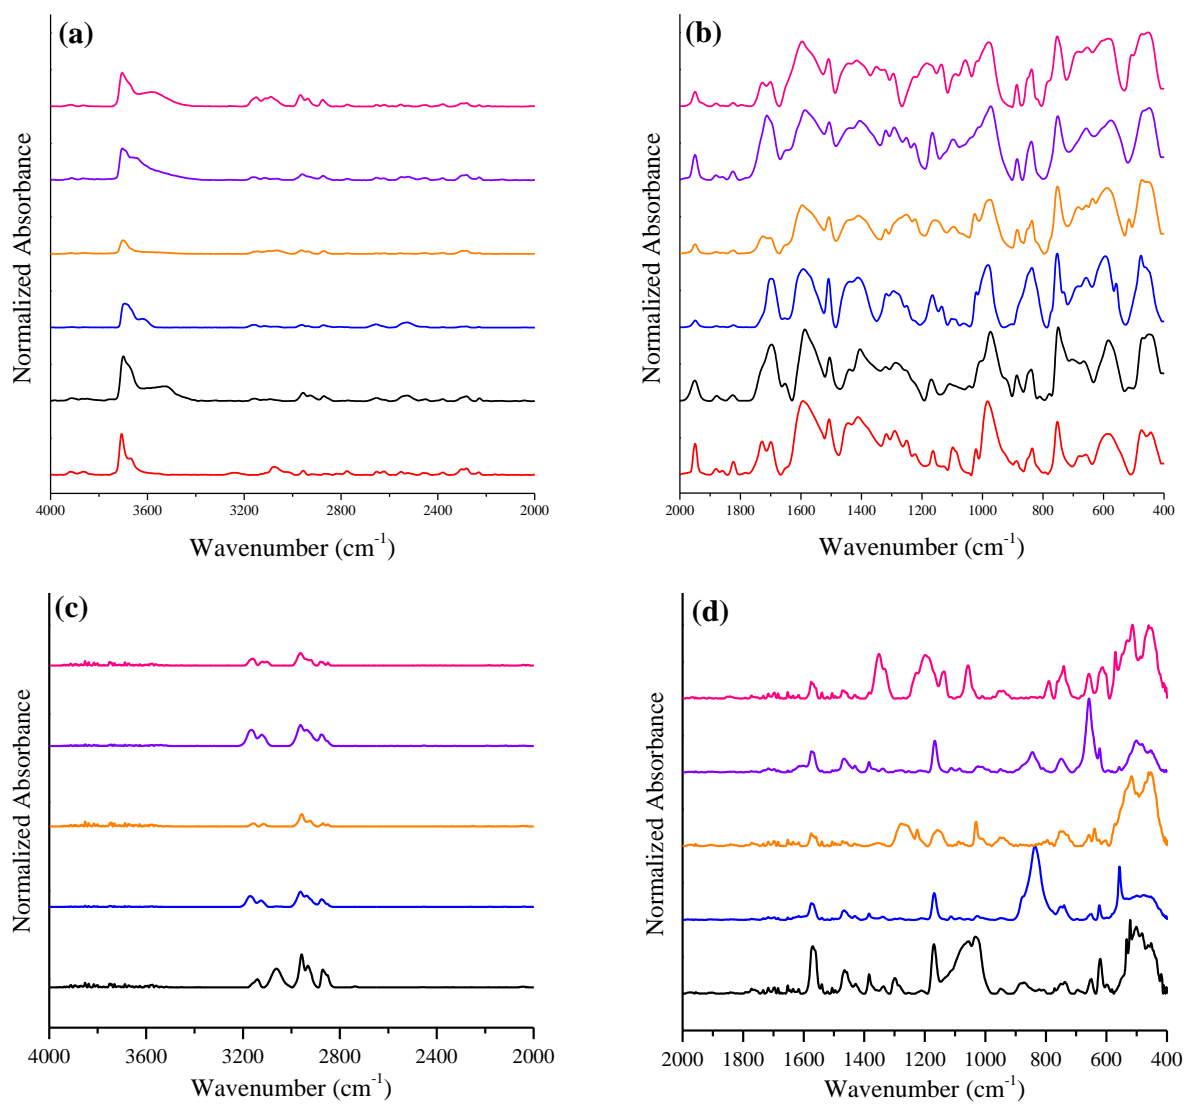

**Figure S5.** IR spectra of pristine MIL-53(Al) and IL/MIL-53(Al) composites in the region of (a) 4000-2000  $\text{cm}^{-1}$  and (b) 2000-400  $\text{cm}^{-1}$ , and of bulk ILs in the region of (c) 4000-2000  $\text{cm}^{-1}$  and (d) 2000-400  $\text{cm}^{-1}$ . Color code: red, pristine MIL-53(Al); black, [BMIM][BF<sub>4</sub>]; blue, [BMIM][PF<sub>6</sub>]; orange, [BMIM][CF<sub>3</sub>SO<sub>3</sub>]; violet, [BMIM][SbF<sub>6</sub>]; pink, [BMIM][NTf<sub>2</sub>].

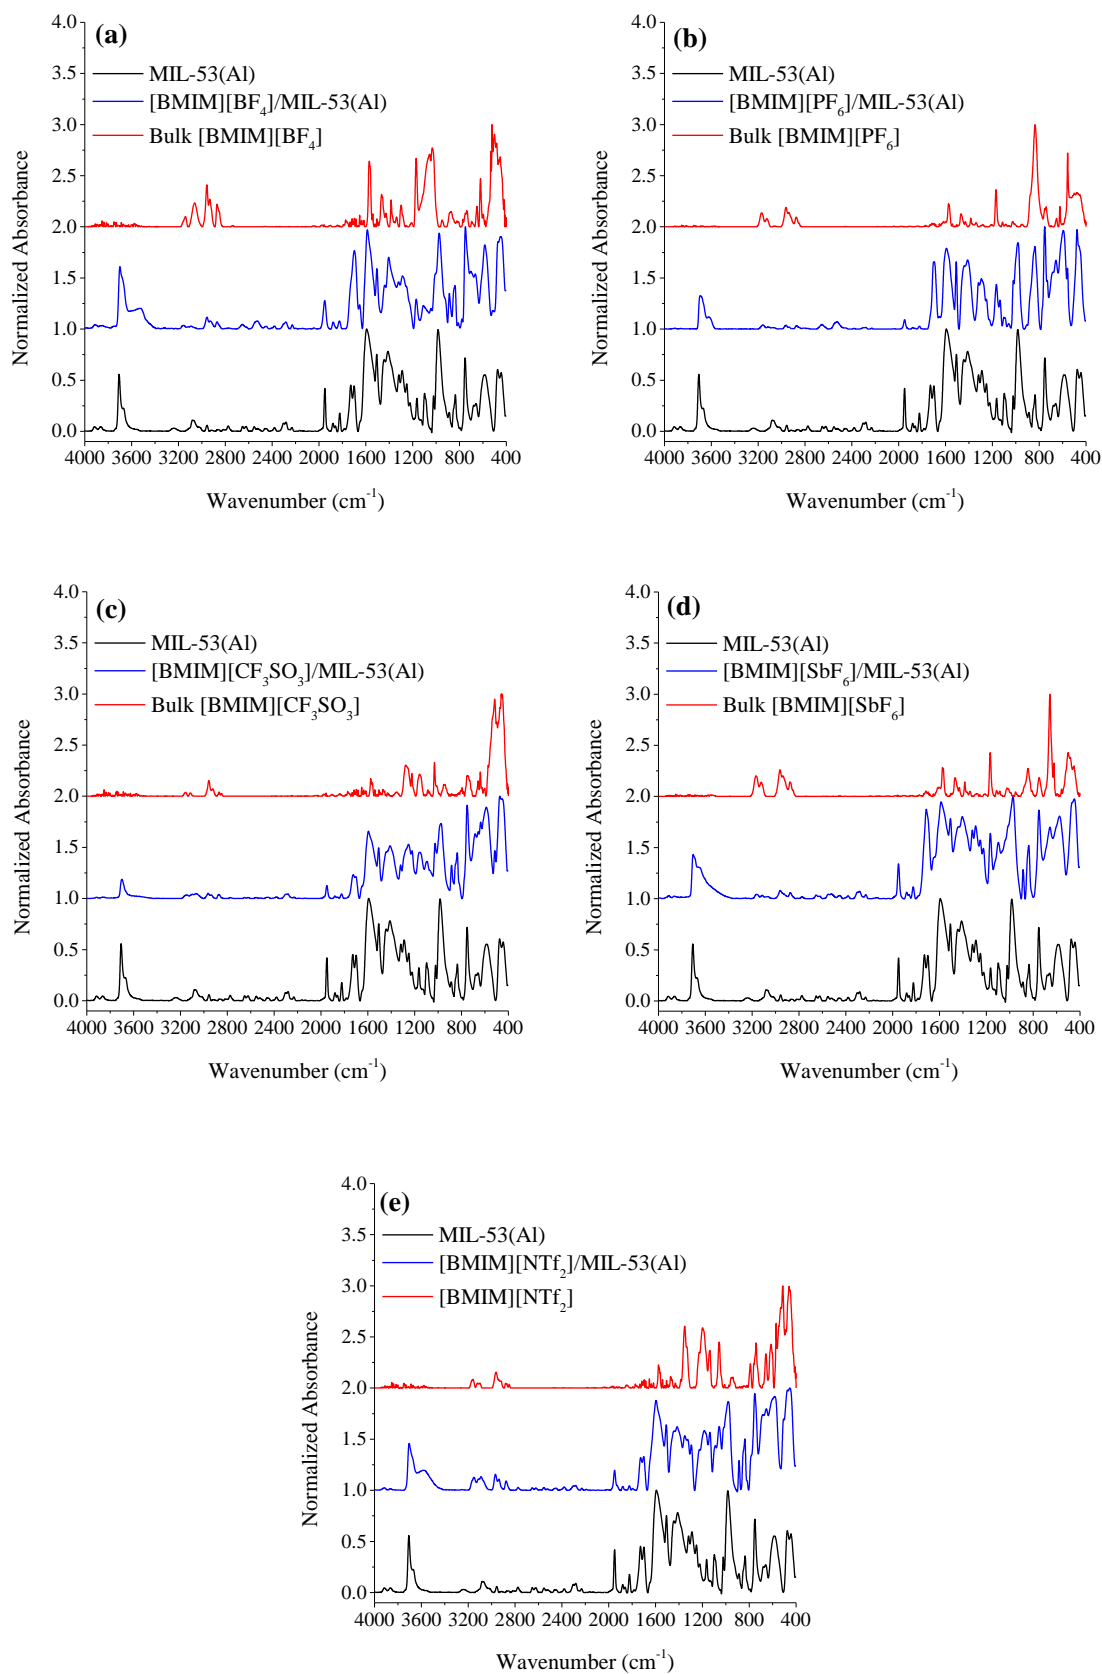

**Figure S6.** IR spectra comparison of pristine MIL-53(Al), bulk ILs and IL/MIL-53(Al) composites between 4000-400  $\text{cm}^{-1}$ , where the IL is (a) [BMIM][BF<sub>4</sub>], (b) [BMIM][PF<sub>6</sub>], (c) [BMIM][CF<sub>3</sub>SO<sub>3</sub>], (d) [BMIM][SbF<sub>6</sub>], and (e) [BMIM][NTf<sub>2</sub>].

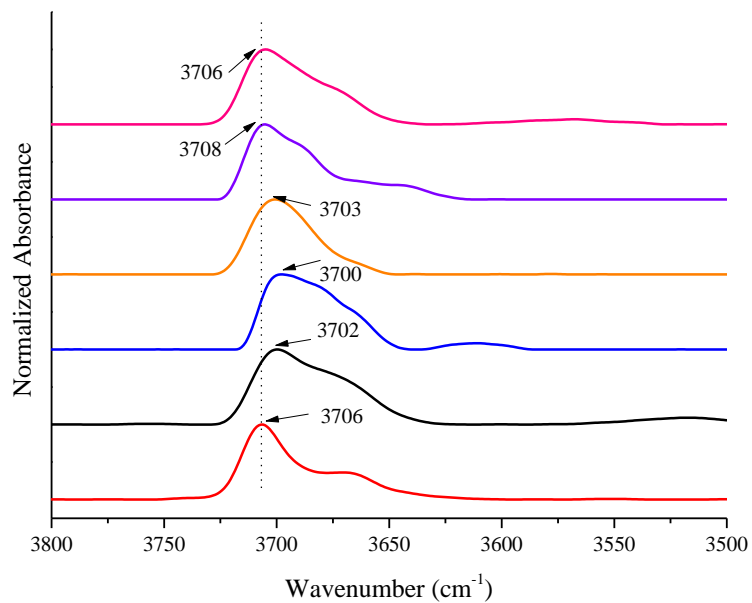

**Figure S7.** IR spectra showing  $\mu_2(\text{O-H})$  vibrations of pristine MIL-53(Al) and IL/MIL-53(Al) composites around  $3700\text{ cm}^{-1}$ . From bottom to top: pristine MIL-53(Al), [BMIM][BF<sub>4</sub>]/MIL-53(Al), [BMIM][PF<sub>6</sub>]/MIL-53(Al), [BMIM][CF<sub>3</sub>SO<sub>3</sub>]/MIL-53(Al), [BMIM][SbF<sub>6</sub>]/MIL-53(Al), and [BMIM][NTf<sub>2</sub>]/MIL-53(Al), respectively.

**Table S6.** Assignments for the vibrational IR bands of MIL-53(Al).

| Vibrational Band Assignment                   | Position of the peak (cm <sup>-1</sup> ) |
|-----------------------------------------------|------------------------------------------|
| $\mu_2(\text{O-H})$                           | 3706                                     |
| $\nu_{\text{sym}}(\text{Al-O-Al})$            | 658                                      |
| $\nu_{\text{as}}(\text{Al-O-Al})$             | 681                                      |
| $\delta(\text{C-C-C}) + \delta(\text{O-C-O})$ | 853                                      |
| $\delta(\text{O-H})$                          | 980                                      |
|                                               | 992                                      |
| $\delta(\text{C-C-C}) + \delta(\text{C-H})$   | 1024                                     |
| $\nu_{\text{sym}}(\text{O-C-O})$              | 1414                                     |
| $\nu(\text{C-C}) + \delta(\text{C-H})$        | 1505                                     |

**Table S7.** Assignments for the vibrational IR bands of bulk ILs.

| Vibrational Band Assignment            | Position of the peak (cm <sup>-1</sup> ) |                              |                                              |                               |                               |
|----------------------------------------|------------------------------------------|------------------------------|----------------------------------------------|-------------------------------|-------------------------------|
|                                        | [BMIM]<br>[BF <sub>4</sub> ]             | [BMIM]<br>[PF <sub>6</sub> ] | [BMIM]<br>[CF <sub>3</sub> SO <sub>3</sub> ] | [BMIM]<br>[SbF <sub>6</sub> ] | [BMIM]<br>[NTf <sub>2</sub> ] |
| $\nu_{\text{ss}}(\text{C(4)HC(5)H})$   | 3173                                     | 3170                         | 3158                                         | 3167                          | 3169                          |
| $\nu(\text{C(2)-H})$                   | 3125                                     | 3124                         | 3115                                         | 3122                          | 3122                          |
| $\nu_{\text{ss}}(\text{N})\text{CH}_3$ | 2965                                     | 2963                         | 2958                                         | 2966                          | 2963                          |
| $\nu_{\text{FR}}(\text{CH}_3)$         | 2933                                     | 2936                         | 2924                                         | 2938                          | 2935                          |
| $\nu_{\text{ss}}(\text{CH}_3)$         | 2862                                     | 2850                         | 2849                                         | 2867                          | 2848                          |
| $\nu_{\text{as}}(\text{CH}_2)$         | 2876                                     | 2874                         | 2869                                         | 2879                          | 2881                          |
|                                        | 751 <sup>a</sup>                         | 736 <sup>c</sup>             | 1280 <sup>d</sup>                            | 658 <sup>g</sup>              | 740 <sup>h</sup>              |
|                                        | 1021 <sup>b</sup>                        | 836 <sup>c</sup>             | 1225 <sup>d</sup>                            |                               | 791 <sup>i</sup>              |
|                                        | 1169 <sup>b</sup>                        | 557 <sup>c</sup>             | 1257 <sup>e</sup>                            |                               | 1058 <sup>j</sup>             |
|                                        |                                          |                              | 1161 <sup>f</sup>                            |                               | 1137 <sup>k</sup>             |
|                                        |                                          |                              |                                              |                               | 1130 <sup>l</sup>             |
|                                        |                                          |                              |                                              |                               | 1167 <sup>m</sup>             |

<sup>a</sup> $\nu_{\text{ss}}(\text{BF}_4)$ , <sup>b</sup> $\nu_{\text{as}}(\text{BF}_4)$ , <sup>c</sup> $\nu_{\text{as}}(\text{PF}_6)$ , <sup>d</sup> $\nu_{\text{ss}}(\text{SO}_3)$ , <sup>e</sup> $\nu_{\text{as}}(\text{SO}_3)$ , <sup>f</sup> $\nu_{\text{as}}(\text{CF}_3)$ , <sup>g</sup> $\nu(\text{SbF}_6)$ , <sup>h</sup> $\nu(\text{C-S})$ , <sup>i</sup> $\nu_{\text{ss}}(\text{S-N})$ , <sup>j</sup> $\nu_{\text{as}}(\text{S-N})$ , <sup>k</sup> $\nu_{\text{ss}}(\text{SO}_2)$ , <sup>l</sup> $\nu_{\text{as}}(\text{SO}_2)$  and <sup>m</sup> $\nu_{\text{as}}(\text{CF}_3)$ .

**Table S8.** Assignments of MOF originated IR shifts of IL/MIL-53(Al) composites. Table is color mapped according to the magnitude of the red or blue shifts. For the convenience, [BMIM]<sup>+</sup> in the names of ILs are not mentioned in the table.

|                                               | [BF <sub>4</sub> ]<br>/MIL-53(Al) | [PF <sub>6</sub> ]<br>/MIL-53(Al) | [CF <sub>3</sub> SO <sub>3</sub> ]<br>/MIL-53(Al) | [SbF <sub>6</sub> ]<br>/MIL-53(Al) | [NTf <sub>2</sub> ]<br>/MIL-53(Al) |
|-----------------------------------------------|-----------------------------------|-----------------------------------|---------------------------------------------------|------------------------------------|------------------------------------|
| $\mu_2(\text{O-H})$                           | -4                                | -6                                | -3                                                | 2                                  | 0                                  |
| $\nu_{\text{sym}}(\text{Al-O-Al})$            | -6                                | -4                                | 0                                                 | -3                                 | -2                                 |
| $\nu_{\text{as}}(\text{Al-O-Al})$             | -17                               | -19                               | 3                                                 | 12                                 | 9                                  |
| $\delta(\text{C-C-C}) + \delta(\text{O-C-O})$ | -4                                | -3                                | -2                                                | -3                                 | -1                                 |
| $\delta(\text{O-H})$                          | -13                               | -6                                | -9                                                | -10                                | -12                                |
|                                               | -14                               | -7                                | -5                                                | -2                                 | -14                                |
| $\delta(\text{C-C-C}) + \delta(\text{C-H})$   | -11                               | -1                                | 3                                                 | -6                                 | -2                                 |
| $\nu_{\text{sym}}(\text{O-C-O})$              | -7                                | -6                                | -6                                                | -6                                 | 1                                  |
| $\nu(\text{C-C}) + \delta(\text{C-H})$        | -1                                | 3                                 | 2                                                 | 1                                  | 3                                  |

**Table S9.** Assignments of IL originated IR shifts of IL/MIL-53(Al) composites. Table is color mapped according to the magnitude of the red or blue shifts. For the convenience, [BMIM]<sup>+</sup> in the names of ILs are not mentioned in the table.

|                                      | [BF <sub>4</sub> ]<br>/MIL-53(Al) | [PF <sub>6</sub> ]<br>/MIL-53(Al) | [CF <sub>3</sub> SO <sub>3</sub> ]<br>/MIL-53(Al) | [SbF <sub>6</sub> ]<br>/MIL-53(Al) | [NTf <sub>2</sub> ]<br>/MIL-53(Al) |
|--------------------------------------|-----------------------------------|-----------------------------------|---------------------------------------------------|------------------------------------|------------------------------------|
| $\nu_{\text{ss}}(\text{C(4)HC(5)H})$ | -4                                | -8                                | 4                                                 | 1                                  | -1                                 |
| $\nu(\text{C(2)-H})$                 | -5                                | -6                                | -11                                               | -8                                 | -8                                 |
| $\nu_{\text{ss}}(\text{N)CH}_3$      | -6                                | 1                                 | 6                                                 | -6                                 | 5                                  |
| $\nu_{\text{FR}}(\text{CH}_3)$       | -8                                | -2                                | 10                                                | -8                                 | 2                                  |
| $\nu_{\text{ss}}(\text{CH}_3)$       | -11                               | 9                                 | -1                                                | -11                                | 21                                 |
| $\nu_{\text{as}}(\text{CH}_2)$       | -5                                | 0                                 | 0                                                 | -5                                 | -2                                 |
|                                      | 2 <sup>a</sup>                    | -6 <sup>c</sup>                   | -5 <sup>d</sup>                                   | 3 <sup>g</sup>                     | 11 <sup>h</sup>                    |
|                                      | -8 <sup>b</sup>                   | 0 <sup>c</sup>                    | -6 <sup>d</sup>                                   |                                    | -4 <sup>i</sup>                    |
|                                      | 0 <sup>b</sup>                    | 0 <sup>c</sup>                    | -1 <sup>e</sup>                                   |                                    | 2 <sup>j</sup>                     |
|                                      |                                   |                                   | 6 <sup>f</sup>                                    |                                    | -3 <sup>k</sup>                    |
|                                      |                                   |                                   |                                                   | -7 <sup>l</sup>                    |                                    |
|                                      |                                   |                                   |                                                   | -1 <sup>m</sup>                    |                                    |

<sup>a</sup> $\nu_{\text{ss}}(\text{BF}_4)$ , <sup>b</sup> $\nu_{\text{as}}(\text{BF}_4)$ , <sup>c</sup> $\nu_{\text{as}}(\text{PF}_6)$ , <sup>d</sup> $\nu_{\text{ss}}(\text{SO}_3)$ , <sup>e</sup> $\nu_{\text{as}}(\text{SO}_3)$ , <sup>f</sup> $\nu_{\text{as}}(\text{CF}_3)$ , <sup>g</sup> $\nu(\text{SbF}_6)$ , <sup>h</sup> $\nu(\text{C-S})$ , <sup>i</sup> $\nu_{\text{ss}}(\text{S-N})$ , <sup>k</sup> $\nu_{\text{as}}(\text{S-N})$ , <sup>l</sup> $\nu_{\text{as}}(\text{SO}_2)$ , and <sup>m</sup> $\nu_{\text{as}}(\text{CF}_3)$ .



## COSMO-RS Calculations for Ionic Liquids

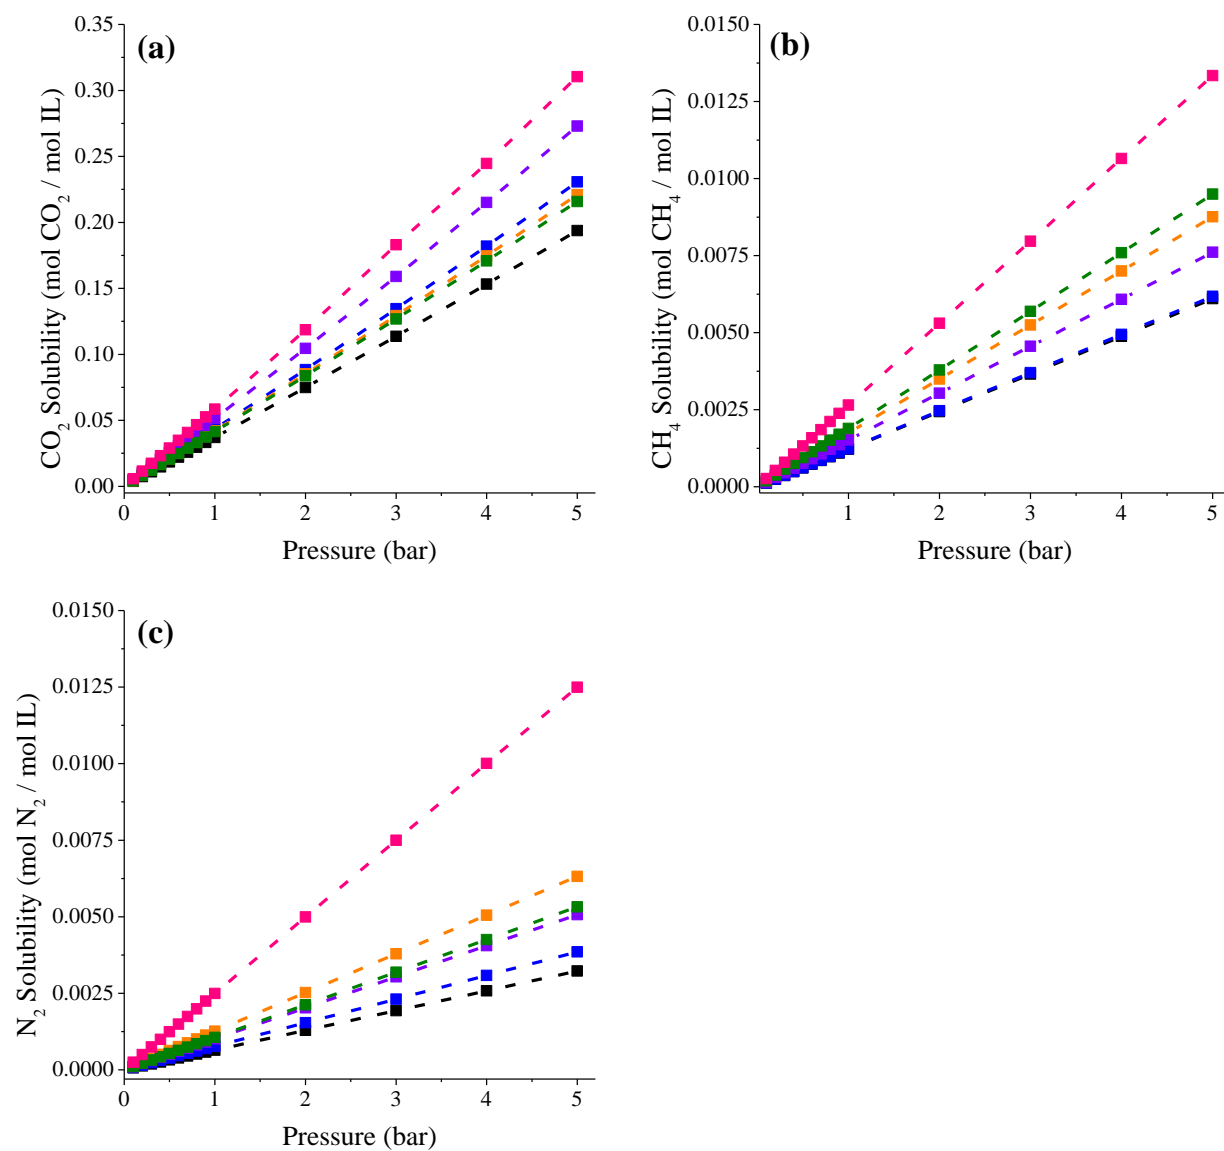

**Figure S8.** (a)  $\text{CO}_2$ , (b)  $\text{CH}_4$ , and (c)  $\text{N}_2$  solubilities of bulk ILs calculated by COSMO-RS. Color code: black, [BMIM][BF<sub>4</sub>]; blue, [BMIM][PF<sub>6</sub>]; orange, [BMIM][CF<sub>3</sub>SO<sub>3</sub>]; violet, [BMIM][SbF<sub>6</sub>]; olive, [BMIM][MeSO<sub>4</sub>]; pink, [BMIM][NTf<sub>2</sub>].

## Gas Adsorption Analyses

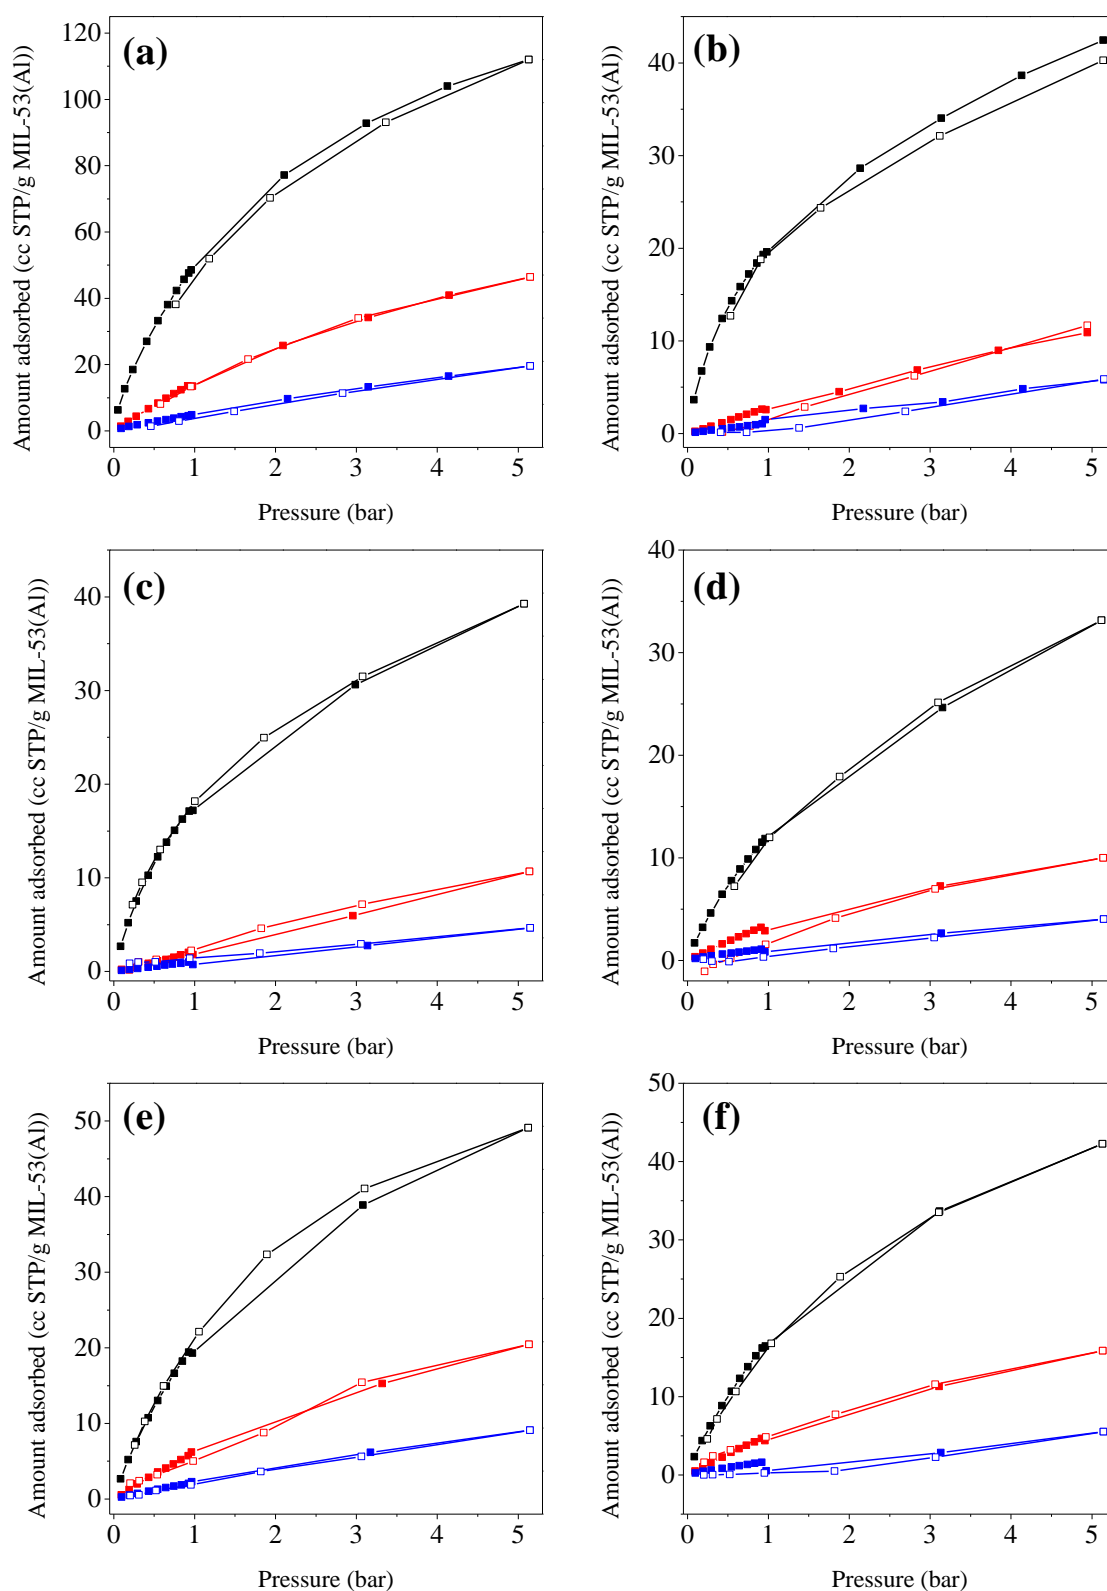

**Figure S9.** Gas adsorption-desorption isotherms of (a) pristine MIL-53(Al), (b) [BMIM][BF<sub>4</sub>]/MIL-53(Al), (c) [BMIM][PF<sub>6</sub>]/MIL-53(Al), (d) [BMIM][CF<sub>3</sub>SO<sub>3</sub>]/MIL-53(Al), (e) [BMIM][SbF<sub>6</sub>]/MIL-53(Al), and (f) [BMIM][NTf<sub>2</sub>]/MIL-53(Al). Color code: black, CO<sub>2</sub>; red, CH<sub>4</sub>; blue, N<sub>2</sub>. Filled (empty) squares represent adsorption (desorption).

**Table S10.** Fitting parameters of dual-site Langmuir model\* for pristine MIL-53(Al) and IL/MIL-53(Al) composites.

| Sample                                                 | Gas             | $q_1$<br>(cc/g)       | $k_1$<br>(1/mbar)      | $q_2$<br>(cc/g)         | $k_2$<br>(1/mbar)      | $R^2$ |
|--------------------------------------------------------|-----------------|-----------------------|------------------------|-------------------------|------------------------|-------|
| <b>Pristine MIL-53(Al)</b>                             | CO <sub>2</sub> | 161.337               | 0.358                  | 7.756                   | 13.599                 | 0.999 |
|                                                        | CH <sub>4</sub> | 101.860               | 0.163                  | 1.321×10 <sup>-14</sup> | 0.688                  | 0.999 |
|                                                        | N <sub>2</sub>  | 0.629                 | 12.289                 | 101.563                 | 0.045                  | 0.999 |
| <b>[BMIM][BF<sub>4</sub>]/MIL-53(Al)</b>               | CO <sub>2</sub> | 70.618                | 0.113                  | 17.782                  | 2.483                  | 0.999 |
|                                                        | CH <sub>4</sub> | 18.344                | 0.102                  | 207.489                 | 4.720×10 <sup>-3</sup> | 0.999 |
|                                                        | N <sub>2</sub>  | 41.829                | 0.015                  | 40.203                  | 0.015                  | 0.997 |
| <b>[BMIM][PF<sub>6</sub>]/MIL-53(Al)</b>               | CO <sub>2</sub> | 581.187               | 6.055×10 <sup>-3</sup> | 28.715                  | 1.154                  | 0.999 |
|                                                        | CH <sub>4</sub> | 7466.430              | 2.938×10 <sup>-4</sup> | 8.916×10 <sup>-4</sup>  | 1.527×10 <sup>-8</sup> | 0.999 |
|                                                        | N <sub>2</sub>  | 0.382                 | 1.191                  | 2165.180                | 4.073×10 <sup>-4</sup> | 0.999 |
| <b>[BMIM][CF<sub>3</sub>SO<sub>3</sub>]/MIL-53(Al)</b> | CO <sub>2</sub> | 11.215                | 0.989                  | 100.075                 | 0.035                  | 0.998 |
|                                                        | CH <sub>4</sub> | 964.945               | 4.025×10 <sup>-4</sup> | 8.829                   | 0.301                  | 0.999 |
|                                                        | N <sub>2</sub>  | 0.477                 | 3.942                  | 2075.560                | 3.573×10 <sup>-4</sup> | 0.997 |
| <b>[BMIM][SbF<sub>6</sub>]/MIL-53(Al)</b>              | CO <sub>2</sub> | 77.429                | 0.238                  | 10.307                  | 1.647                  | 0.999 |
|                                                        | CH <sub>4</sub> | 37.695                | 0.146                  | 12.650                  | 0.146                  | 0.999 |
|                                                        | N <sub>2</sub>  | 42.569                | 0.056                  | 0.149                   | 4.146                  | 0.999 |
| <b>[BMIM][MeSO<sub>4</sub>]/MIL-53(Al)</b>             | CO <sub>2</sub> | 33.579                | 0.859                  | 302.378                 | 1.009×10 <sup>-2</sup> | 0.999 |
|                                                        | CH <sub>4</sub> | 540.923               | 1.321×10 <sup>-3</sup> | 317.435                 | 5.671×10 <sup>-3</sup> | 0.998 |
|                                                        | N <sub>2</sub>  | 4242.480              | 1.738×10 <sup>-4</sup> | 0.057                   | 1.498                  | 0.983 |
| <b>[BMIM][NTf<sub>2</sub>]/MIL-53(Al)</b>              | CO <sub>2</sub> | 0.945                 | 15.491                 | 71.001                  | 0.329                  | 0.999 |
|                                                        | CH <sub>4</sub> | 875.965               | 5.034×10 <sup>-4</sup> | 29.674                  | 0.193                  | 0.999 |
|                                                        | N <sub>2</sub>  | 1.000×10 <sup>4</sup> | 7.662×10 <sup>-5</sup> | 1.484                   | 1.668                  | 0.984 |

\*Dual-site Langmuir model is as follows,

$$n(P) = q_1 \times \frac{k_1 \times P}{1 + k_1 \times P} + q_2 \times \frac{k_2 \times P}{1 + k_2 \times P}$$

where  $P$  is the pressure of bulk gas at equilibrium with the adsorbed phase.  $q_1$  and  $q_2$  represent the saturation capacity on sites #1 and #2, while  $k_1$  and  $k_2$  are the affinity constants.

**Table S11.** Fitting parameters for virial-type thermal adsorption equation\* for CO<sub>2</sub>, CH<sub>4</sub> and N<sub>2</sub> isotherms measured at 10 and 20 °C for [BMIM][PF<sub>6</sub>]/MIL-53(Al) composite material.

| Fit<br>Parameters    | MIL-53(Al)                |                 |                | [BMIM][PF <sub>6</sub> ]/MIL-53(Al) |                 |                |
|----------------------|---------------------------|-----------------|----------------|-------------------------------------|-----------------|----------------|
|                      | CO <sub>2</sub>           | CH <sub>4</sub> | N <sub>2</sub> | CO <sub>2</sub>                     | CH <sub>4</sub> | N <sub>2</sub> |
| <b>a<sub>0</sub></b> | -4213.780                 | -1890.370       | -1504.709      | -4365.530                           | -1345.460       | -1216.670      |
| <b>a<sub>1</sub></b> | 98.790                    | -13.505         | 10             | 55.650                              | -13.530         | -14.490        |
| <b>a<sub>2</sub></b> | -1.750                    | 0.034           | -0.971         | 4.450 × 10 <sup>-2</sup>            | -0.930          | -0.930         |
| <b>a<sub>3</sub></b> | 9.090 × 10 <sup>-3</sup>  | 0               | 0              | -3.640 × 10 <sup>-2</sup>           | 0               | 0              |
| <b>a<sub>4</sub></b> | 9.570 × 10 <sup>-6</sup>  | 0               | 0              | 3.500 × 10 <sup>-4</sup>            | 0               | 0              |
| <b>a<sub>5</sub></b> | -6.460 × 10 <sup>-8</sup> | 0               | 0              | 4.500 × 10 <sup>-8</sup>            | 0               | 0              |
| <b>b<sub>0</sub></b> | 11.000                    | 3.768           | 3.236          | 12.560                              | 3.970           | 2.780          |
| <b>b<sub>1</sub></b> | -0.280                    | 0.056           | 0.066          | -0.270                              | 0.120           | 0.510          |
| <b>b<sub>2</sub></b> | 5.280 × 10 <sup>-3</sup>  | 0               | 0              | 6.820 × 10 <sup>-3</sup>            | 0               | 0              |
| <b>b<sub>3</sub></b> | -2.820 × 10 <sup>-5</sup> | 0               | 0              | -3.700 × 10 <sup>-5</sup>           | 0               | 0              |

\*Virial-type thermal adsorption equation:

$$\ln P = \ln N + \frac{1}{T} \sum_{i=0}^5 a_i N^i + \sum_{i=0}^3 b_i N^i$$

where  $N$  is the gas uptake,  $P$  is the pressure of gas at equilibrium,  $T$  is the temperature and,  $a_i$  and  $b_i$  are the fitting parameters of the equation.

Isosteric heat of adsorption ( $Q_{st}$ ) is calculated using the equation below;

$$Q_{st} = -R \sum_{i=0}^5 a_i N^i$$

where  $N$  is the gas uptake,  $R$  is the gas constant, and  $a_i$  is fitting parameters obtained by fitting the virial-type thermal adsorption equation.

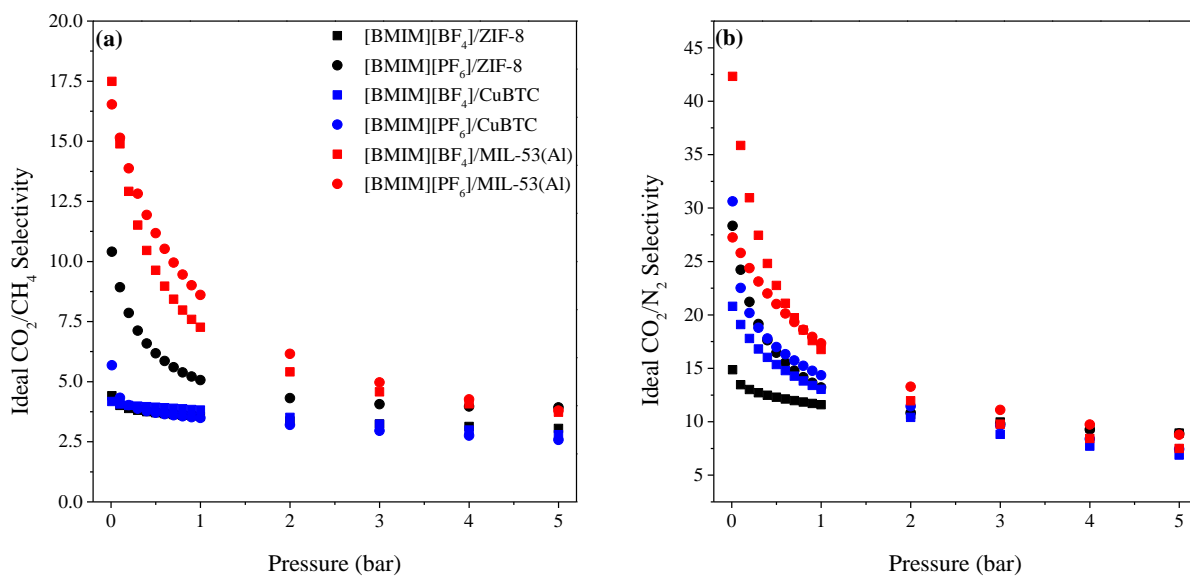

**Figure S10.** Ideal (a)  $\text{CO}_2/\text{CH}_4$  and (b)  $\text{CO}_2/\text{N}_2$  selectivities of  $[\text{BMIM}][\text{BF}_4]$ -incorporated and  $[\text{BMIM}][\text{PF}_6]$ -incorporated ZIF-8,<sup>[2,9]</sup> CuBTC,<sup>[1,8]</sup> and MIL-53(Al) composites as a function of pressure.

#### *Characterization of $[\text{BMIM}][\text{MeSO}_4]/\text{MIL-53(Al)}$*

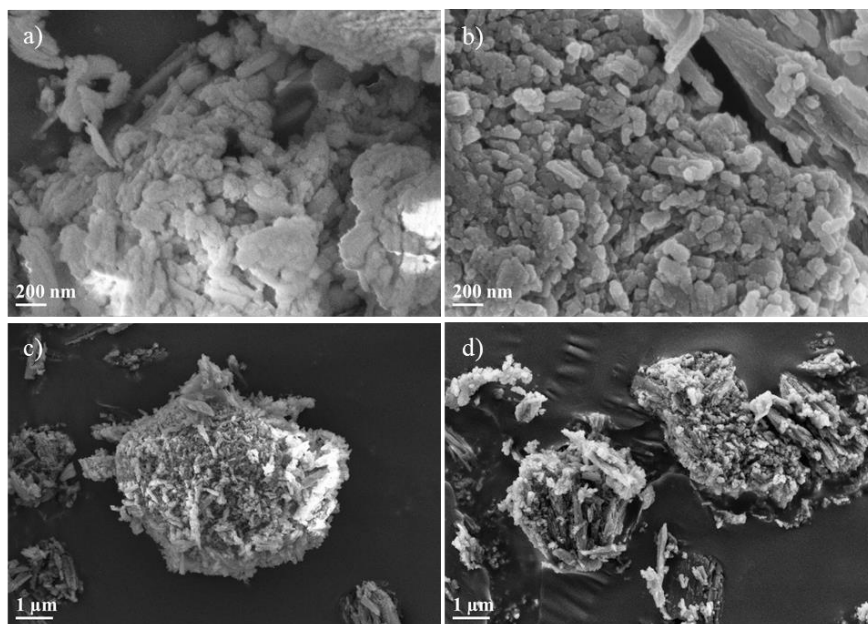

**Figure S11.** SEM micrographs of (a and c) MIL-53(Al) and (b and d)  $[\text{BMIM}][\text{MeSO}_4]/\text{MIL-53(Al)}$  at a magnification of 100 K $\times$  (a, b) and 25 K $\times$  (c, d). Reprinted with the permission from Ref.<sup>[7]</sup> Copyright 2019 Wiley-VCH.



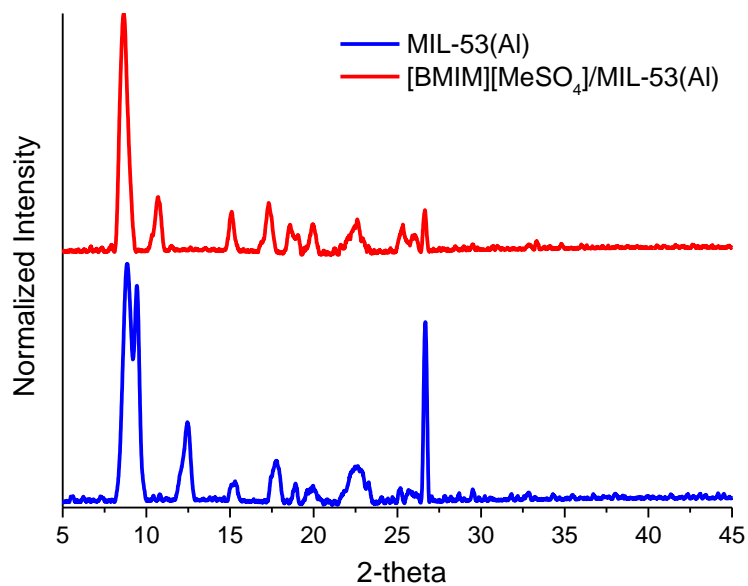

**Figure S12.** X-ray diffraction patterns of MIL-53(Al) (blue) and [BMIM][MeSO<sub>4</sub>]/MIL-53(Al) (red). Reprinted with the permission from Ref.<sup>[7]</sup> Copyright 2019 Wiley-VCH.

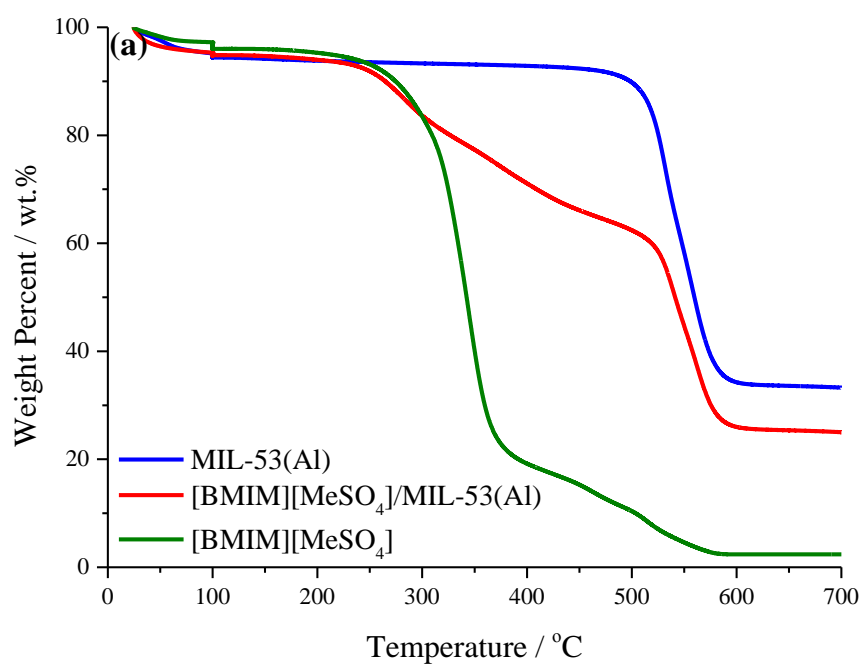

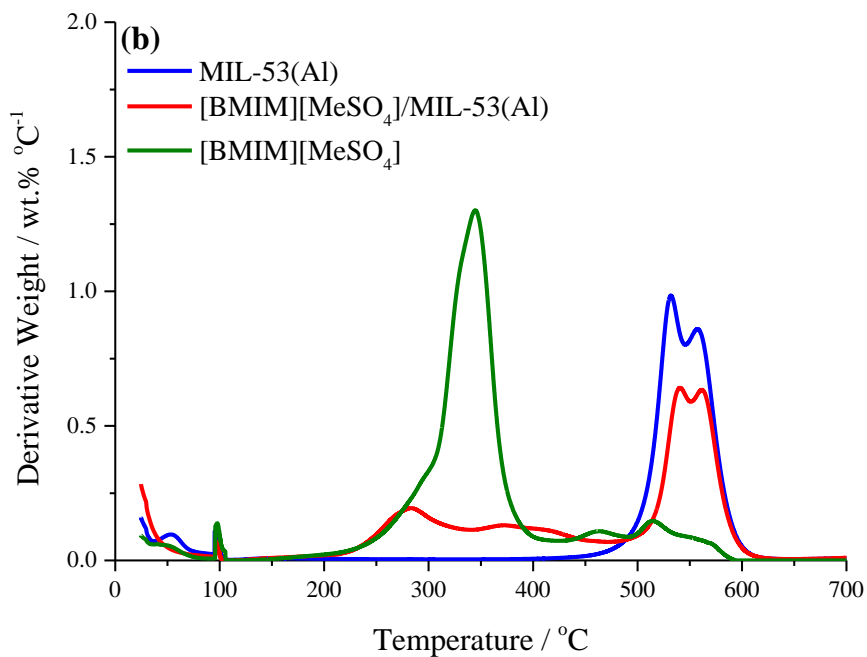

**Figure S13.** (a) TGA and (b) DTG curves of pristine MIL-53(Al) (blue), bulk [BMIM][MeSO<sub>4</sub>] (green), and [BMIM][MeSO<sub>4</sub>]/MIL-53(Al) (red) samples. Reprinted with the permission from Ref.<sup>[7]</sup> Copyright 2019 Wiley-VCH.

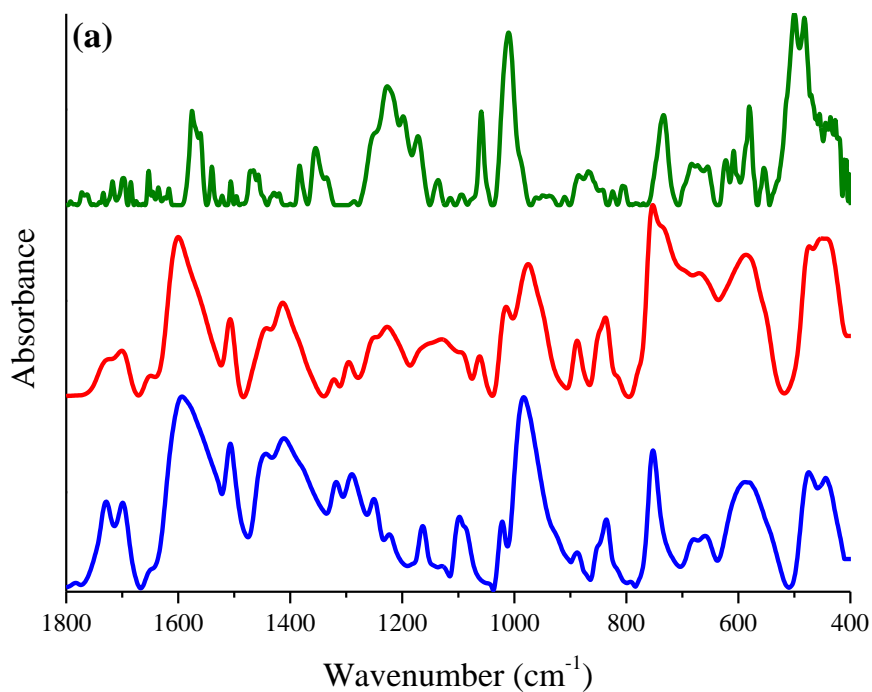

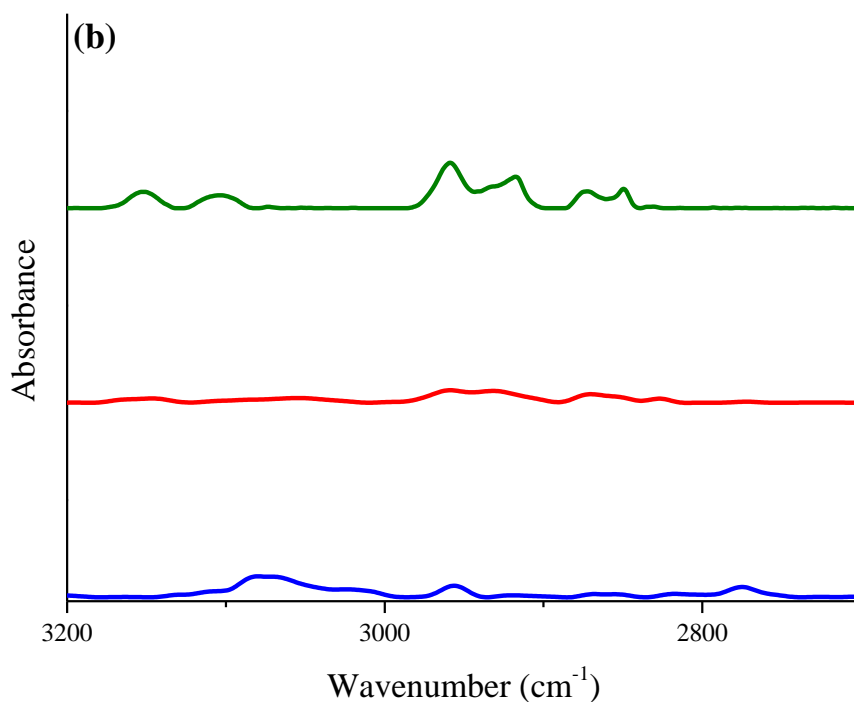

**Figure S14.** FTIR spectra of pristine MIL-53(Al) (blue), bulk [BMIM][MeSO<sub>4</sub>] (green), and [BMIM][MeSO<sub>4</sub>]/MIL-53(Al) (red) samples between (a) 1800 and 400 cm<sup>-1</sup>, and (b) 3200 and 2700 cm<sup>-1</sup>. Reprinted with the permission from Ref.<sup>[7]</sup> Copyright 2019 Wiley-VCH.

## References

- [1] V. Nozari, M. Zeeshan, S. Keskin, A. Uzun, *CrystEngComm* **2018**, *20*, 7137-7143.
- [2] F. P. Kinik, C. Altintas, V. Balci, B. Koyuturk, A. Uzun, S. Keskin, *ACS Appl. Mater. Interfaces* **2016**, *8*, 30992-31005.
- [3] F. H. Allen, *Acta Cryst.* **2002**, *B58*, 380-388.
- [4] T. Loiseau, C. Serre, C. Huguenard, G. Fink, F. Taulelle, M. Henry, T. Bataille, G. Férey, *Chem. Eur. J.* **2004**, *10*, 1373-1382.
- [5] K. Fumino, A. Wulf, R. Ludwig, *Angew. Chem. Int. Ed.* **2008**, *47*, 3830-3834.
- [6] K. Nakamoto in *Infrared and Raman Spectra of Inorganic and Coordination Compounds*, 4th Ed., Wiley Interscience, New York, USA, **1986**.
- [7] H. Kulak, H. M. Polat, S. Kavak, S. Keskin, A. Uzun, *Energy Technol.* **2019**, Doi: 10.1002/ente.201900157.
- [8] K. B. Sezginel, S. Keskin, A. Uzun, *Langmuir* **2016**, *32*, 1139-1147.
- [9] B. Koyuturk, C. Altintas, F. P. Kinik, S. Keskin, A. Uzun, *J. Phys. Chem. C* **2017**, *121*, 10370-10381.
